# Supplementary material for: Prediction of disulfide dihedral angles using chemical shifts
Source: Royal Society of Chemistry journal article supplement (doi:10.1039/c8sc01423j), 2018-01-01
Supplement: c8sc01423j1.pdf [file c8sc01423j1.pdf]

## **Supporting Information**

### **Prediction of disulfide dihedral angles using chemical shifts**

David A. Armstrong, Quentin Kaas, K. Johan Rosengren

**Table S1.** Performance of DISH  $\chi_1$  prediction when  $\varphi$  and  $\psi$  angles are removed as inputs

|                                                                  | Stage I MCC | Stage II MCC |
|------------------------------------------------------------------|-------------|--------------|
| DISH Inputs SVM- $\chi_1$                                        | 0.89        | 0.70         |
| Chemical shift and secondary structure only inputs SVM- $\chi_1$ | 0.62        | 0.39         |

**Table S2.** Performance of DISH  $\chi_2$  prediction when  $\chi_1$  angles are removed as inputs

|                                                          | Stage I MCC | Stage II MCC |
|----------------------------------------------------------|-------------|--------------|
| DISH Inputs SVM- $\chi_2$                                | 0.85        | 0.85         |
| Chemical shift and secondary structure only inputs SVM-2 | 0.62        | 0.74         |

**Table S3.** The Cys residues of Ep-AMP1 and  $\chi_1$  angles derived from the E.COSY spectrum,  $\chi_1$  angles predicted by TALOS-N and the  $\chi_1$  and  $\chi_2$  angles predicted by DISH as either gauche+ (g+), gauche- (g-) or trans (t).

| Residue | $\chi_1$ E.COSY | $\chi_1$ DISH   | $\chi_1$ TALOS-N | $\chi_2$ DISH |
|---------|-----------------|-----------------|------------------|---------------|
| 1       | -               | -               | -                | -             |
| 8       | -               | g- <sup>a</sup> | g+               | g-            |
| 16      | g-              | g-              | g-               | g-            |
| 17      | g-              | g-              | -                | g-            |
| 23      | -               | t               | -                | t             |
| 33      | g-              | g-              | g-               | g-            |

<sup>a</sup> Was found to violate in initial structures and removed from final calculations

**Table S4.** The Cys residues of barrettide A and  $\chi_1$  angles calculated from the E.COSY spectrum,  $\chi_1$  angles predicted by TALOS-N and the  $\chi_1$  and  $\chi_2$  angles predicted by DISH, either gauche+ (g+), gauche- (g-) or trans (t).

| Residue | $\chi_1$ E.COSY | $\chi_1$ DISH | $\chi_1$ TALOS-N | $\chi_2$ DISH | $\chi_2$ DISH using experimental $\chi_1$ as input |
|---------|-----------------|---------------|------------------|---------------|----------------------------------------------------|
| 5       | t               | t             | -                | g+            | -                                                  |
| 7       | g-              | g-            | -                | g-            | -                                                  |
| 18      | g-              | g-            | g-               | g-            | -                                                  |
| 23      | g+              | g-            | -                | g-            | g-                                                 |

**Table S5.** Statistics from MolProbity and backbone RMSD of the original Ep-AMP1 structure, and revised structures with additional  $\chi_1$  and  $\chi_2$  restraints. All values are averaged over 20 structures  $\pm$  STDEV.

|                             | Original        | Additional $\chi_1$ and $\chi_2$ |
|-----------------------------|-----------------|----------------------------------|
| Clash Score <sup>a</sup>    | 7.0 $\pm$ 2.0   | 11.9 $\pm$ 4.5                   |
| Poor Rotamers               | 0.10 $\pm$ 0.3  | 0.00 $\pm$ 0.00                  |
| Favoured Rotamers (%)       | 94.5 $\pm$ 3.8  | 93.4 $\pm$ 3.3                   |
| Ramachandran Outliers       | 0.25 $\pm$ 0.55 | 0.0 $\pm$ 0.0                    |
| Ramachandran Favoured (%)   | 91.5 $\pm$ 4.0  | 94.90 $\pm$ 3.7                  |
| MolProb. Score <sup>b</sup> | 1.9 $\pm$ 0.19  | 1.9 $\pm$ 0.20                   |
| Percentile (%) <sup>c</sup> | 81.2 $\pm$ 8.2  | 81.2 $\pm$ 8.23                  |
| <b>RMSD (Å)</b>             |                 |                                  |
| Mean Global Backbone        | 0.86 $\pm$ 0.27 | 0.55 $\pm$ 0.11                  |
| Mean Global Heavy           | 1.61 $\pm$ 0.29 | 1.34 $\pm$ 0.18                  |

Definition of MolProbity structural statistics.

<sup>a</sup>The number of non-donor-acceptor atoms that overlap by more than 0.4 Å per 1000 atoms

<sup>b</sup> Overall quality of protein statistics. Log weighted combination of the clash score, percentage Ramachandran not favoured and percentage of bad side chain rotamers. Reflects the crystallographic resolution for structures that those values would be expected

<sup>c</sup> 100<sup>th</sup> percentile is the best among structures of comparable resolution; 0th percentile is the worst.

**Table S6.** Statistics from MolProbity and backbone RMSD of the original barrettide A structure, and re-evaluated structure with  $\chi_2$  restraints. Values are averaged over the 20 lowest energy models  $\pm$  STDEV.

|                                 | Original        | Additional $\chi_1$ and $\chi_2$ |
|---------------------------------|-----------------|----------------------------------|
| Clash Score <sup>a</sup>        | 8.7 $\pm$ 3.5   | 9.6 $\pm$ 3.2                    |
| Poor Rotamers                   | 0.10 $\pm$ 0.31 | 0.11 $\pm$ 0.3                   |
| Favoured Rotamers (%)           | 96.7 $\pm$ 3.4  | 95.6 $\pm$ 3.9                   |
| Ramachandran Outliers           | 0.2 $\pm$ 0.41  | 0.25 $\pm$ 0.4                   |
| Ramachandran Favoured (%)       | 94.7 $\pm$ 3.7  | 92.2 $\pm$ 3.3                   |
| MolProb. Score <sup>b</sup>     | 1.8 $\pm$ 0.32  | 2.0 $\pm$ 0.18                   |
| Percentile (%) <sup>c</sup>     | 82.9 $\pm$ 13.8 | 75.9 $\pm$ 9.9                   |
| Residues with bad bonds         | 0.2 $\pm$ 0.41  | 0.45 $\pm$ 0.37                  |
| <b>RMSD (Residues 5-23) (Å)</b> |                 |                                  |
| Mean Global Backbone            | 0.92 $\pm$ 0.34 | 0.64 $\pm$ 0.19                  |
| Mean Global Heavy               | 1.58 $\pm$ 0.35 | 1.34 $\pm$ 0.22                  |

Definition of MolProbity structural statistics.

<sup>a</sup>The number of non-donor-acceptor atoms that overlap by more than 0.4 Å per 1000 atoms

<sup>b</sup> Overall quality of protein statistics. Log weighted combination of the clash score, percentage Ramachandran not favoured and percentage of bad side chain rotamers. Reflects the crystallographic resolution for structures that those values would be expected

<sup>c</sup> 100<sup>th</sup> percentile is the best among structures of comparable resolution; 0th percentile is the worst.

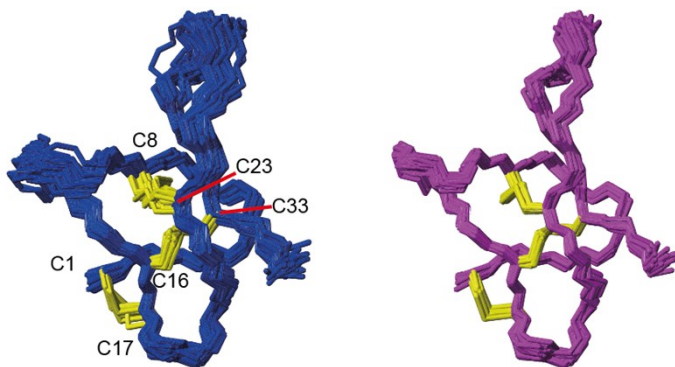

**Figure S1.** Comparison of the backbone conformation of the 20 lowest energy models of Ep-AMP1 computed using CNS without DISH predictions (PDB 2MFS; in blue) and with DISH predictions (in pink). Cystine side chains are in yellow sticks.

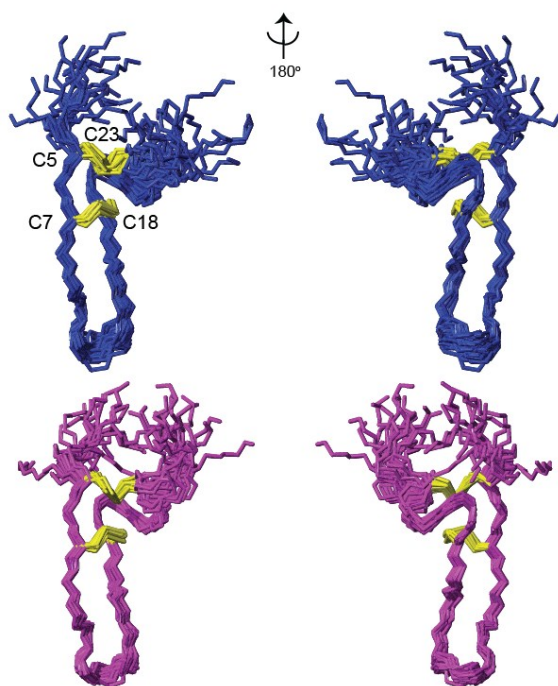

**Figure S2.** Comparison of the backbone conformation of the 20 lowest energy models of barrettide A computed using CNS without DISH predictions (in blue) and with DISH predictions (in pink). Cystine side chains are in yellow sticks.

**Table S7.** DISH predictions for Cys residues of hen lysozyme and compared to those extracted from the X-ray crystallography structure (PDB 1iee)

| Residue | $\chi$ 1 X-ray | $\chi$ 1 DISH | $\chi$ 2 X-Ray | $\chi$ 2 DISH |
|---------|----------------|---------------|----------------|---------------|
| 6       | g-             | g-            | g-             | g-            |
| 30      | t              | t             | g-             | g-            |
| 64      | g+             | g+            | g+             | g+            |
| 76      | g-             | g-            | g-             | g-            |
| 80      | g-             | g-            | g-             | g-            |
| 94      | t              | t             | g+             | g+            |
| 115     | g-             | g-            | g-             | g-            |
| 127     | g-             | g-            | g-             | g-            |

**Table S8.** Backbone alignment of hen lysozyme NMR structures without DISH predictions and with DISH predictions to the X-ray structure (PDB 1iee).

|                                       | No Cys $\chi$ 1 and $\chi$ 2 | Cys $\chi$ 1 and $\chi$ 2 |
|---------------------------------------|------------------------------|---------------------------|
| <b>All Residue Backbone Alignment</b> |                              |                           |
| Mean global backbone RMSD (Å)         | 1.73 ± 0.27                  | 1.55 ± 0.28               |
| Mean global heavy RMSD (Å)            | 2.49 ± 0.24                  | 2.35 ± 0.32               |
| <b>Cys Backbone Alignment</b>         |                              |                           |
| Mean global backbone RMSD (Å)         | 1.18 ± 0.30                  | 0.82 ± 0.13               |
| Mean global heavy RMSD (Å)            | 1.32 ± 0.32                  | 0.87 ± 0.18               |
